# Supplementary material for: Seroconversion and Abundance of IgG Antibodies against S1-RBD of SARS-CoV-2 and Neutralizing Activity in the Chilean Population
Source: Hindawi journal article supplement (doi:10.1155/2021/6680337), 2021-02-19
Supplement: f1 [file 6680337.f1.pdf]

## SUPPLEMENTARY DATA

### “SEROCONVERSION AND ABUNDANCE OF IgG ANTIBODIES AGAINST S1-RBD OF SARS-COV-2 AND NEUTRALIZING ACTIVITY IN CHILEAN POPULATION”

González-Stegmaier, R., Cereceda, K., Briones, JL., Beltran-Pávez, C., Oyarzún-Arrau, A., Riquelme-Barrios, S., Selman, C., Yarad, F., Mahave, M., Caglevic, C., Morales, R., Aguirre, A., Valiente-Echeverría, F., Soto-Rifo, R., Marsiglia, H., Gazitua, R., and Villarroel-Espíndola, F.

#### SUPPLEMENTARY TABLE S1

|                                | <b>Convalescent</b>  | <b>Active</b>   | <b>Healthy</b> |
|--------------------------------|----------------------|-----------------|----------------|
| Total cases                    | 690                  | 26              | 25             |
| Age Range (years)              | 18-68                | 19-83           | 28-53          |
| Women                          | 361                  | 9               | 7              |
| Men                            | 278                  | 17              | 18             |
| <i>Sample collection</i>       |                      |                 |                |
| Days after symptoms onset      | NA                   | 0-14 (3.5±3.8)* | NA             |
| Days after symptoms offset     | 21-123 (34±12.7)*    | NA              | NA             |
| Symptomatology during COVID-19 | Mild to Moderate     | Severe          | NA             |
| Symptomatology at collection   | Asymptomatic to Mild | Critically ill  | Asymptomatic   |
| PCR test                       | Positive             | Positive        | Negative       |

\*median±SD

## SUPPLEMENTARY TABLE S2

|                                                           |             |
|-----------------------------------------------------------|-------------|
| Active COVID cases                                        | <b>N=26</b> |
| mean age (years)                                          | 54.76       |
| <b><i>Treatments previous to the blood collection</i></b> |             |
|                                                           | <b>N</b>    |
| Hydroxychloroquine                                        | 1           |
| Chloroquine                                               | 0           |
| Azithromycin                                              | 11          |
| Lopinavir/Ritonavir                                       | 0           |
| Tocilizumab                                               | 0           |
| Remdisivir                                                | 0           |
| ACE inhibitors                                            | 0           |
| Angiotensin II receptor blockers                          | 0           |
| Methylprednisolone                                        | 4           |
| Betamethasone                                             | 0           |
| Dexamethasone                                             | 1           |
| Prednisone                                                | 0           |
| Hydrocortisone                                            | 1           |
| None                                                      | 8           |

**SUPPLEMENTARY TABLE S3**

|                            | Qualitative ELISA                                                        | Quantitative ELISA                                               |
|----------------------------|--------------------------------------------------------------------------|------------------------------------------------------------------|
| S1-RBD antigen bound       | 50 ng                                                                    | 50 ng                                                            |
| Sample dilution            | 1:320                                                                    | 1:320                                                            |
| Sample Incubation time     | 1 hour                                                                   | 1 hour                                                           |
| HRP-conjugated antibody    | 20 ng/ml                                                                 | 20 ng/ml                                                         |
| conjugated incubation time | 1 hour                                                                   | 1 hour                                                           |
| Developing time            | 15 min                                                                   | 15 min                                                           |
| Principle method           | Qualitative absorbance ratio between the unknown sample and a calibrator | Quantitative interpolation from a standard calibration curve     |
| Calibrator                 | Known standard serum                                                     | not required                                                     |
| Positive Control           | Titered known serum (absorbance ratio >2.5, 7.5%CV)                      | Known positive serum (absorbance 1.63±0.08, 5%CV)                |
| Negative Control           | Titered known serum (absorbance ratio <0.8, 5%CV)                        | Known negative serum (absorbance 0.26±0.01, 5%CV)                |
| Blank                      | not required                                                             | Sample dilution buffer                                           |
| Calibration curve          | not required                                                             | human IgG1 anti-S1-RBD                                           |
| Linearity                  | Not applicable                                                           | 6.25 - 50.00 µg/mL                                               |
| Interpretation             | Positive: ratio>1.1; Negative: ratio<0.9; Undetermined: 1.1-0.9          | Positive: calculated value above the cutoff (healthy population) |
| Sensitivity                | 99.0%                                                                    | 99.0%                                                            |
| Specificity                | 85.0%                                                                    | 98.5%                                                            |

## SUPPLEMENTARY FIGURES

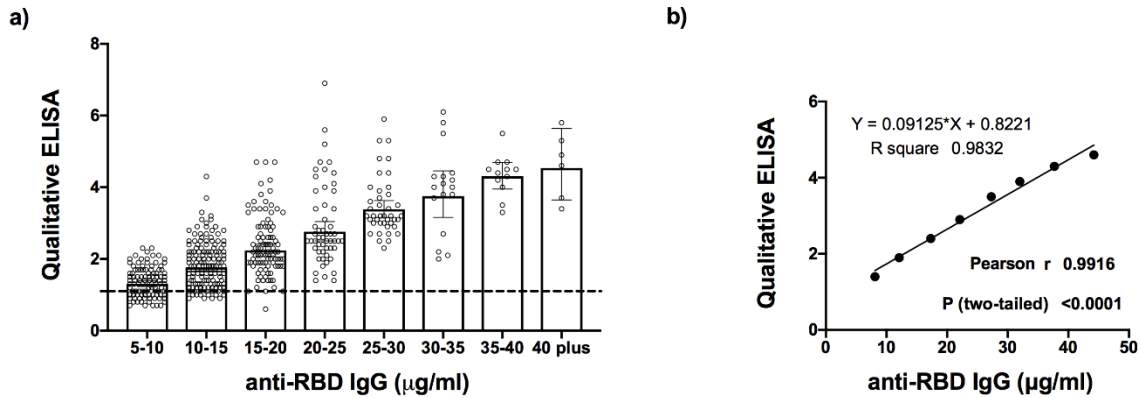

**Supplementary Figure 1: Qualitative and quantitative ELISA performance.** In a) Histogram with the calculated absorbance ratio in a qualitative analysis (positive, ratio above 1.1 as dotted line) and its corresponding anti-RBD IgG concentration range. Data were shown as mean $\pm$ 95IC; b) correlation between qualitative and quantitative ELISA analysis, average for absorbance ratio and concentration were represented as continuous variables.

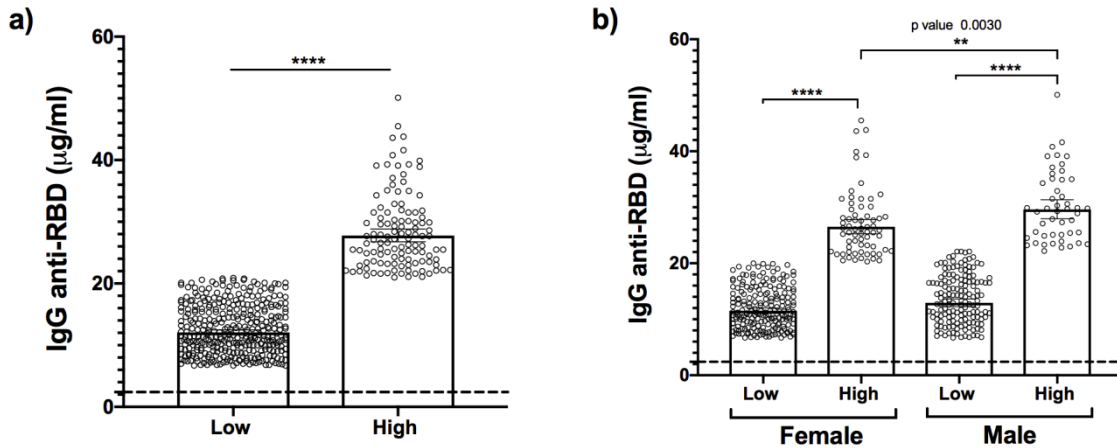

**Supplementary Figure 2: high and low levels of anti-RBD IgG in recovered COVID-19 patients.** High (n=116) and low (n=350) levels were estimated as above or below the 75<sup>th</sup> percentile for global cohort (a) or separated by gender (b). In both cases the dotted line corresponds to the group of healthy individuals. Asterisks indicate significant differences between group and analyzed with Mann-Whitney test. \*\*\*\*p<0.0001.
